# Supplementary material
Source: PubMed Central journal article supplement (PMC6609448)
Supplement: EMS83236-supplement-2.pdf [file EMS83236-supplement-2.pdf]

## Supplementary Table 2

### 8 basepair barcoded double-stranded DamID adapters

48 top oligos 5' to 3'

TGATCCGGTAATACGACTCACTATAGGGGTTTCAGAGTTCTACAGTCCGACGATC>NNNTTGGATCCCA  
TGATCCGGTAATACGACTCACTATAGGGGTTTCAGAGTTCTACAGTCCGACGATC>NNNAGGTAACCCA  
TGATCCGGTAATACGACTCACTATAGGGGTTTCAGAGTTCTACAGTCCGACGATC>NNNTCGGTCTTCA  
TGATCCGGTAATACGACTCACTATAGGGGTTTCAGAGTTCTACAGTCCGACGATC>NNNGCGACATACA  
TGATCCGGTAATACGACTCACTATAGGGGTTTCAGAGTTCTACAGTCCGACGATC>NNNGAATAGGCCA  
TGATCCGGTAATACGACTCACTATAGGGGTTTCAGAGTTCTACAGTCCGACGATC>NNNACTACGTGCA  
TGATCCGGTAATACGACTCACTATAGGGGTTTCAGAGTTCTACAGTCCGACGATC>NNNATCTCACGCA  
TGATCCGGTAATACGACTCACTATAGGGGTTTCAGAGTTCTACAGTCCGACGATC>NNNTACGTGTCCA  
TGATCCGGTAATACGACTCACTATAGGGGTTTCAGAGTTCTACAGTCCGACGATC>NNNAGTCAGGTCA  
TGATCCGGTAATACGACTCACTATAGGGGTTTCAGAGTTCTACAGTCCGACGATC>NNNGACTCATCCA  
TGATCCGGTAATACGACTCACTATAGGGGTTTCAGAGTTCTACAGTCCGACGATC>NNNTAAGGAGCCA  
TGATCCGGTAATACGACTCACTATAGGGGTTTCAGAGTTCTACAGTCCGACGATC>NNNCAAGACCACA  
TGATCCGGTAATACGACTCACTATAGGGGTTTCAGAGTTCTACAGTCCGACGATC>NNNCGAGTGATCA  
TGATCCGGTAATACGACTCACTATAGGGGTTTCAGAGTTCTACAGTCCGACGATC>NNNCATTAGGCCA  
TGATCCGGTAATACGACTCACTATAGGGGTTTCAGAGTTCTACAGTCCGACGATC>NNNGCCTATAGCA  
TGATCCGGTAATACGACTCACTATAGGGGTTTCAGAGTTCTACAGTCCGACGATC>NNNATGCCTCACA  
TGATCCGGTAATACGACTCACTATAGGGGTTTCAGAGTTCTACAGTCCGACGATC>NNNTCCGCAACA  
TGATCCGGTAATACGACTCACTATAGGGGTTTCAGAGTTCTACAGTCCGACGATC>NNNCTAACTCGCA  
TGATCCGGTAATACGACTCACTATAGGGGTTTCAGAGTTCTACAGTCCGACGATC>NNNAACCTCTCCA  
TGATCCGGTAATACGACTCACTATAGGGGTTTCAGAGTTCTACAGTCCGACGATC>NNNTAAGCTGCCA  
TGATCCGGTAATACGACTCACTATAGGGGTTTCAGAGTTCTACAGTCCGACGATC>NNNGAGATACGCA  
TGATCCGGTAATACGACTCACTATAGGGGTTTCAGAGTTCTACAGTCCGACGATC>NNNACTGTCAGCA  
TGATCCGGTAATACGACTCACTATAGGGGTTTCAGAGTTCTACAGTCCGACGATC>NNNGGAACAGTCA  
TGATCCGGTAATACGACTCACTATAGGGGTTTCAGAGTTCTACAGTCCGACGATC>NNNTCACAAGGCA  
TGATCCGGTAATACGACTCACTATAGGGGTTTCAGAGTTCTACAGTCCGACGATC>NNNTTCGTTGGCA  
TGATCCGGTAATACGACTCACTATAGGGGTTTCAGAGTTCTACAGTCCGACGATC>NNNTAGGCCTACA  
TGATCCGGTAATACGACTCACTATAGGGGTTTCAGAGTTCTACAGTCCGACGATC>NNNGCTGTACACA  
TGATCCGGTAATACGACTCACTATAGGGGTTTCAGAGTTCTACAGTCCGACGATC>NNNTCGCTAACCA  
TGATCCGGTAATACGACTCACTATAGGGGTTTCAGAGTTCTACAGTCCGACGATC>NNNAGTCTCGACA  
TGATCCGGTAATACGACTCACTATAGGGGTTTCAGAGTTCTACAGTCCGACGATC>NNNCTGTTACCCA  
TGATCCGGTAATACGACTCACTATAGGGGTTTCAGAGTTCTACAGTCCGACGATC>NNNGACTGACACA  
TGATCCGGTAATACGACTCACTATAGGGGTTTCAGAGTTCTACAGTCCGACGATC>NNNGGTTAACGCA  
TGATCCGGTAATACGACTCACTATAGGGGTTTCAGAGTTCTACAGTCCGACGATC>NNNAGTTCTCGCA  
TGATCCGGTAATACGACTCACTATAGGGGTTTCAGAGTTCTACAGTCCGACGATC>NNNTGCAATGCCA  
TGATCCGGTAATACGACTCACTATAGGGGTTTCAGAGTTCTACAGTCCGACGATC>NNNCTGACGATCA  
TGATCCGGTAATACGACTCACTATAGGGGTTTCAGAGTTCTACAGTCCGACGATC>NNNGTCTCAAGCA  
TGATCCGGTAATACGACTCACTATAGGGGTTTCAGAGTTCTACAGTCCGACGATC>NNNGATCACACCA  
TGATCCGGTAATACGACTCACTATAGGGGTTTCAGAGTTCTACAGTCCGACGATC>NNNGCAGGTATCA  
TGATCCGGTAATACGACTCACTATAGGGGTTTCAGAGTTCTACAGTCCGACGATC>NNNACGTATGGCA  
TGATCCGGTAATACGACTCACTATAGGGGTTTCAGAGTTCTACAGTCCGACGATC>NNNTGTGTCCACA  
TGATCCGGTAATACGACTCACTATAGGGGTTTCAGAGTTCTACAGTCCGACGATC>NNNAAGTGCAGCA  
TGATCCGGTAATACGACTCACTATAGGGGTTTCAGAGTTCTACAGTCCGACGATC>NNNCGATTACCCA  
TGATCCGGTAATACGACTCACTATAGGGGTTTCAGAGTTCTACAGTCCGACGATC>NNNATGGTCACCA  
TGATCCGGTAATACGACTCACTATAGGGGTTTCAGAGTTCTACAGTCCGACGATC>NNNACAAGAGGCA

TGATCCGGTAATACGACTCACTATAGGGGTTTCAGAGTTCTACAGTCCGACGATC>NNNGTTCGAGACA  
TGATCCGGTAATACGACTCACTATAGGGGTTTCAGAGTTCTACAGTCCGACGATC>NNNCCATATCGCA  
TGATCCGGTAATACGACTCACTATAGGGGTTTCAGAGTTCTACAGTCCGACGATC>NNNATTGAGGCCA  
TGATCCGGTAATACGACTCACTATAGGGGTTTCAGAGTTCTACAGTCCGACGATC>NNNCGAGATCACA

bottom 48 oligos 5' to 3'

/5Phos/TGGGATCCAANNNGATCGTCGGACTGTAGAACTCTGAACCCCTATAGTGAGTCGTATTACCGGGAGC  
/5Phos/TGGGTTACCTNNNGATCGTCGGACTGTAGAACTCTGAACCCCTATAGTGAGTCGTATTACCGGGAGC  
/5Phos/TGAAGACCGANNNGATCGTCGGACTGTAGAACTCTGAACCCCTATAGTGAGTCGTATTACCGGGAGC  
/5Phos/TGTATGTGCGCNNNGATCGTCGGACTGTAGAACTCTGAACCCCTATAGTGAGTCGTATTACCGGGAGC  
/5Phos/TGGCCTATTCNNNGATCGTCGGACTGTAGAACTCTGAACCCCTATAGTGAGTCGTATTACCGGGAGC  
/5Phos/TGCACGTAGTNNNGATCGTCGGACTGTAGAACTCTGAACCCCTATAGTGAGTCGTATTACCGGGAGC  
/5Phos/TGCGTGAGATNNNGATCGTCGGACTGTAGAACTCTGAACCCCTATAGTGAGTCGTATTACCGGGAGC  
/5Phos/TGGACACGTANNNGATCGTCGGACTGTAGAACTCTGAACCCCTATAGTGAGTCGTATTACCGGGAGC  
/5Phos/TGACCTGACTNNNGATCGTCGGACTGTAGAACTCTGAACCCCTATAGTGAGTCGTATTACCGGGAGC  
/5Phos/TGGATGAGTCNNNGATCGTCGGACTGTAGAACTCTGAACCCCTATAGTGAGTCGTATTACCGGGAGC  
/5Phos/TGGCTCCTTANNNGATCGTCGGACTGTAGAACTCTGAACCCCTATAGTGAGTCGTATTACCGGGAGC  
/5Phos/TGTGGTCTTGNNNGATCGTCGGACTGTAGAACTCTGAACCCCTATAGTGAGTCGTATTACCGGGAGC  
/5Phos/TGATCACTCGNNNGATCGTCGGACTGTAGAACTCTGAACCCCTATAGTGAGTCGTATTACCGGGAGC  
/5Phos/TGGCCTAATGNNNGATCGTCGGACTGTAGAACTCTGAACCCCTATAGTGAGTCGTATTACCGGGAGC  
/5Phos/TGCTATAGGCNNNGATCGTCGGACTGTAGAACTCTGAACCCCTATAGTGAGTCGTATTACCGGGAGC  
/5Phos/TGTGAGGCATNNNGATCGTCGGACTGTAGAACTCTGAACCCCTATAGTGAGTCGTATTACCGGGAGC  
/5Phos/TGTTGCGGAANNNGATCGTCGGACTGTAGAACTCTGAACCCCTATAGTGAGTCGTATTACCGGGAGC  
/5Phos/TGCGAGTTAGNNNGATCGTCGGACTGTAGAACTCTGAACCCCTATAGTGAGTCGTATTACCGGGAGC  
/5Phos/TGGAGAGGTTNNNGATCGTCGGACTGTAGAACTCTGAACCCCTATAGTGAGTCGTATTACCGGGAGC  
/5Phos/TGGCAGCTTANNNGATCGTCGGACTGTAGAACTCTGAACCCCTATAGTGAGTCGTATTACCGGGAGC  
/5Phos/TGCGTATCTCNNNGATCGTCGGACTGTAGAACTCTGAACCCCTATAGTGAGTCGTATTACCGGGAGC  
/5Phos/TGCTGACAGTNNNGATCGTCGGACTGTAGAACTCTGAACCCCTATAGTGAGTCGTATTACCGGGAGC  
/5Phos/TGACTGTTCCNNNGATCGTCGGACTGTAGAACTCTGAACCCCTATAGTGAGTCGTATTACCGGGAGC  
/5Phos/TGCCTTG TANNNNGATCGTCGGACTGTAGAACTCTGAACCCCTATAGTGAGTCGTATTACCGGGAGC  
/5Phos/TGCCAACGAANNNGATCGTCGGACTGTAGAACTCTGAACCCCTATAGTGAGTCGTATTACCGGGAGC  
/5Phos/TGTAGGCCTANNNGATCGTCGGACTGTAGAACTCTGAACCCCTATAGTGAGTCGTATTACCGGGAGC  
/5Phos/TGTGTACAGCNNNGATCGTCGGACTGTAGAACTCTGAACCCCTATAGTGAGTCGTATTACCGGGAGC  
/5Phos/TGGTTAGCGANNNGATCGTCGGACTGTAGAACTCTGAACCCCTATAGTGAGTCGTATTACCGGGAGC  
/5Phos/TGTCGAGACTNNNGATCGTCGGACTGTAGAACTCTGAACCCCTATAGTGAGTCGTATTACCGGGAGC  
/5Phos/TGGGTAACAGNNNGATCGTCGGACTGTAGAACTCTGAACCCCTATAGTGAGTCGTATTACCGGGAGC  
/5Phos/TGTGTGAGTCNNNGATCGTCGGACTGTAGAACTCTGAACCCCTATAGTGAGTCGTATTACCGGGAGC  
/5Phos/TGCGTTAACNNNGATCGTCGGACTGTAGAACTCTGAACCCCTATAGTGAGTCGTATTACCGGGAGC  
/5Phos/TGCGAGAACTNNNGATCGTCGGACTGTAGAACTCTGAACCCCTATAGTGAGTCGTATTACCGGGAGC  
/5Phos/TGGCATTGCANNNGATCGTCGGACTGTAGAACTCTGAACCCCTATAGTGAGTCGTATTACCGGGAGC  
/5Phos/TGATCGTCAGNNNGATCGTCGGACTGTAGAACTCTGAACCCCTATAGTGAGTCGTATTACCGGGAGC  
/5Phos/TGCTTGAGACNNNGATCGTCGGACTGTAGAACTCTGAACCCCTATAGTGAGTCGTATTACCGGGAGC  
/5Phos/TGGTGTGATCANNNGATCGTCGGACTGTAGAACTCTGAACCCCTATAGTGAGTCGTATTACCGGGAGC  
/5Phos/TGATACCTGCNNNGATCGTCGGACTGTAGAACTCTGAACCCCTATAGTGAGTCGTATTACCGGGAGC  
/5Phos/TGCCATACGTNNNGATCGTCGGACTGTAGAACTCTGAACCCCTATAGTGAGTCGTATTACCGGGAGC  
/5Phos/TGTGGACACANNNGATCGTCGGACTGTAGAACTCTGAACCCCTATAGTGAGTCGTATTACCGGGAGC  
/5Phos/TGCTGCACTTNNNGATCGTCGGACTGTAGAACTCTGAACCCCTATAGTGAGTCGTATTACCGGGAGC

/5Phos/TGGGTAATCGNNGATCGTCGGACTGTAGA AACTCTGAACCCCTATAGTGAGTCGTATTACCGGGAGC  
/5Phos/TGGTGACCATNNGATCGTCGGACTGTAGA AACTCTGAACCCCTATAGTGAGTCGTATTACCGGGAGC  
/5Phos/TGCCTCTGTNNGATCGTCGGACTGTAGA AACTCTGAACCCCTATAGTGAGTCGTATTACCGGGAGC  
/5Phos/TGTCTCGAACNNGATCGTCGGACTGTAGA AACTCTGAACCCCTATAGTGAGTCGTATTACCGGGAGC  
/5Phos/TGCGATATGNNNGATCGTCGGACTGTAGA AACTCTGAACCCCTATAGTGAGTCGTATTACCGGGAGC  
/5Phos/TGGCCTCAATNNGATCGTCGGACTGTAGA AACTCTGAACCCCTATAGTGAGTCGTATTACCGGGAGC  
/5Phos/TGTGATCTCGNNGATCGTCGGACTGTAGA AACTCTGAACCCCTATAGTGAGTCGTATTACCGGGAGC

6 basepair barcoded DamID adapters used for mESCs Dam-Ring1B cells

96 top oligos 5' to 3'

GGTGATCCGGTAATACGACTCACTATAGGGGTT CAGAGTTCTACAGTCCGACGATCN NNCTTCAAGA  
GGTGATCCGGTAATACGACTCACTATAGGGGTT CAGAGTTCTACAGTCCGACGATCN NNAGCCATGA  
GGTGATCCGGTAATACGACTCACTATAGGGGTT CAGAGTTCTACAGTCCGACGATCN NNACACGAGA  
GGTGATCCGGTAATACGACTCACTATAGGGGTT CAGAGTTCTACAGTCCGACGATCN NNGACCTCGA  
GGTGATCCGGTAATACGACTCACTATAGGGGTT CAGAGTTCTACAGTCCGACGATCN NNTGGACAGA  
GGTGATCCGGTAATACGACTCACTATAGGGGTT CAGAGTTCTACAGTCCGACGATCN NNAAGTCCGA  
GGTGATCCGGTAATACGACTCACTATAGGGGTT CAGAGTTCTACAGTCCGACGATCN NNGAAGAAGA  
GGTGATCCGGTAATACGACTCACTATAGGGGTT CAGAGTTCTACAGTCCGACGATCN NNTCTCTTGA  
GGTGATCCGGTAATACGACTCACTATAGGGGTT CAGAGTTCTACAGTCCGACGATCN NNGCGTTAGA  
GGTGATCCGGTAATACGACTCACTATAGGGGTT CAGAGTTCTACAGTCCGACGATCN NNCGTGCTGA  
GGTGATCCGGTAATACGACTCACTATAGGGGTT CAGAGTTCTACAGTCCGACGATCN NNTTCGCCGA  
GGTGATCCGGTAATACGACTCACTATAGGGGTT CAGAGTTCTACAGTCCGACGATCN NNATGGTTGA  
GGTGATCCGGTAATACGACTCACTATAGGGGTT CAGAGTTCTACAGTCCGACGATCN NNGTATGCGA  
GGTGATCCGGTAATACGACTCACTATAGGGGTT CAGAGTTCTACAGTCCGACGATCN NNCCGAATGA  
GGTGATCCGGTAATACGACTCACTATAGGGGTT CAGAGTTCTACAGTCCGACGATCN NNTATCCAGA  
GGTGATCCGGTAATACGACTCACTATAGGGGTT CAGAGTTCTACAGTCCGACGATCN NNTCGTACGA  
GGTGATCCGGTAATACGACTCACTATAGGGGTT CAGAGTTCTACAGTCCGACGATCN NNACTGCCGA  
GGTGATCCGGTAATACGACTCACTATAGGGGTT CAGAGTTCTACAGTCCGACGATCN NNCCCTAGA  
GGTGATCCGGTAATACGACTCACTATAGGGGTT CAGAGTTCTACAGTCCGACGATCN NNCACAACGA  
GGTGATCCGGTAATACGACTCACTATAGGGGTT CAGAGTTCTACAGTCCGACGATCN NNGCTAGAGA  
GGTGATCCGGTAATACGACTCACTATAGGGGTT CAGAGTTCTACAGTCCGACGATCN NNTACTCGA  
GGTGATCCGGTAATACGACTCACTATAGGGGTT CAGAGTTCTACAGTCCGACGATCN NNAGGATCGA  
GGTGATCCGGTAATACGACTCACTATAGGGGTT CAGAGTTCTACAGTCCGACGATCN NNCCAGTTGA  
GGTGATCCGGTAATACGACTCACTATAGGGGTT CAGAGTTCTACAGTCCGACGATCN NNTGAGGAGA  
GGTGATCCGGTAATACGACTCACTATAGGGGTT CAGAGTTCTACAGTCCGACGATCN NNGAGACTGA  
GGTGATCCGGTAATACGACTCACTATAGGGGTT CAGAGTTCTACAGTCCGACGATCN NNTCCAGCGA  
GGTGATCCGGTAATACGACTCACTATAGGGGTT CAGAGTTCTACAGTCCGACGATCN NNAGCGCTGA  
GGTGATCCGGTAATACGACTCACTATAGGGGTT CAGAGTTCTACAGTCCGACGATCN NNCTCTCCGA  
GGTGATCCGGTAATACGACTCACTATAGGGGTT CAGAGTTCTACAGTCCGACGATCN NNGTCAATGA  
GGTGATCCGGTAATACGACTCACTATAGGGGTT CAGAGTTCTACAGTCCGACGATCN NNTACGAAGA  
GGTGATCCGGTAATACGACTCACTATAGGGGTT CAGAGTTCTACAGTCCGACGATCN NNGATATCGA  
GGTGATCCGGTAATACGACTCACTATAGGGGTT CAGAGTTCTACAGTCCGACGATCN NNCTGATAGA  
GGTGATCCGGTAATACGACTCACTATAGGGGTT CAGAGTTCTACAGTCCGACGATCN NNCATTGAGA  
GGTGATCCGGTAATACGACTCACTATAGGGGTT CAGAGTTCTACAGTCCGACGATCN NNGAACAGA  
GGTGATCCGGTAATACGACTCACTATAGGGGTT CAGAGTTCTACAGTCCGACGATCN NNCTACCTGA  
GGTGATCCGGTAATACGACTCACTATAGGGGTT CAGAGTTCTACAGTCCGACGATCN NNGAGGTTGA  
GGTGATCCGGTAATACGACTCACTATAGGGGTT CAGAGTTCTACAGTCCGACGATCN NNCGCTATGA

GGTGATCCGGTAATACGACTCACTATAGGGGTTTCAGAGTTCTACAGTCCGACGATCNNNATGAGCGA  
GGTGATCCGGTAATACGACTCACTATAGGGGTTTCAGAGTTCTACAGTCCGACGATCNNNACAGATGA  
GGTGATCCGGTAATACGACTCACTATAGGGGTTTCAGAGTTCTACAGTCCGACGATCNNNAGTCTCGA  
GGTGATCCGGTAATACGACTCACTATAGGGGTTTCAGAGTTCTACAGTCCGACGATCNNNCCATTCTCGA  
GGTGATCCGGTAATACGACTCACTATAGGGGTTTCAGAGTTCTACAGTCCGACGATCNNNAAAGCCAGA  
GGTGATCCGGTAATACGACTCACTATAGGGGTTTCAGAGTTCTACAGTCCGACGATCNNNGTGTAAGA  
GGTGATCCGGTAATACGACTCACTATAGGGGTTTCAGAGTTCTACAGTCCGACGATCNNNNTCTGCAGA  
GGTGATCCGGTAATACGACTCACTATAGGGGTTTCAGAGTTCTACAGTCCGACGATCNNNGAACGCGA  
GGTGATCCGGTAATACGACTCACTATAGGGGTTTCAGAGTTCTACAGTCCGACGATCNNNAGAAGAGA  
GGTGATCCGGTAATACGACTCACTATAGGGGTTTCAGAGTTCTACAGTCCGACGATCNNNAAACCCGA  
GGTGATCCGGTAATACGACTCACTATAGGGGTTTCAGAGTTCTACAGTCCGACGATCNNNNTGGCAAGA  
GGTGATCCGGTAATACGACTCACTATAGGGGTTTCAGAGTTCTACAGTCCGACGATCNNNNTTCTTCTCGA  
GGTGATCCGGTAATACGACTCACTATAGGGGTTTCAGAGTTCTACAGTCCGACGATCNNNNGGAGTCTCGA  
GGTGATCCGGTAATACGACTCACTATAGGGGTTTCAGAGTTCTACAGTCCGACGATCNNNACCTAAGA  
GGTGATCCGGTAATACGACTCACTATAGGGGTTTCAGAGTTCTACAGTCCGACGATCNNNNGTCCGAGA  
GGTGATCCGGTAATACGACTCACTATAGGGGTTTCAGAGTTCTACAGTCCGACGATCNNNNTGTACTGA  
GGTGATCCGGTAATACGACTCACTATAGGGGTTTCAGAGTTCTACAGTCCGACGATCNNNNGATCATGA  
GGTGATCCGGTAATACGACTCACTATAGGGGTTTCAGAGTTCTACAGTCCGACGATCNNNNCAGTTAGA  
GGTGATCCGGTAATACGACTCACTATAGGGGTTTCAGAGTTCTACAGTCCGACGATCNNNNGCGACAGA  
GGTGATCCGGTAATACGACTCACTATAGGGGTTTCAGAGTTCTACAGTCCGACGATCNNNNCTTGCGA  
GGTGATCCGGTAATACGACTCACTATAGGGGTTTCAGAGTTCTACAGTCCGACGATCNNNNGTTGTAGA  
GGTGATCCGGTAATACGACTCACTATAGGGGTTTCAGAGTTCTACAGTCCGACGATCNNNACTAGCGA  
GGTGATCCGGTAATACGACTCACTATAGGGGTTTCAGAGTTCTACAGTCCGACGATCNNNNCTCCACGA  
GGTGATCCGGTAATACGACTCACTATAGGGGTTTCAGAGTTCTACAGTCCGACGATCNNNNCGACTTGA  
GGTGATCCGGTAATACGACTCACTATAGGGGTTTCAGAGTTCTACAGTCCGACGATCNNNNGAATCCGA  
GGTGATCCGGTAATACGACTCACTATAGGGGTTTCAGAGTTCTACAGTCCGACGATCNNNNTGGTGCGA  
GGTGATCCGGTAATACGACTCACTATAGGGGTTTCAGAGTTCTACAGTCCGACGATCNNNNTACGCTGA  
GGTGATCCGGTAATACGACTCACTATAGGGGTTTCAGAGTTCTACAGTCCGACGATCNNNNCTTCTGA  
GGTGATCCGGTAATACGACTCACTATAGGGGTTTCAGAGTTCTACAGTCCGACGATCNNNNCCGGAAGA  
GGTGATCCGGTAATACGACTCACTATAGGGGTTTCAGAGTTCTACAGTCCGACGATCNNNNAGTGATGA  
GGTGATCCGGTAATACGACTCACTATAGGGGTTTCAGAGTTCTACAGTCCGACGATCNNNNTATCTCGA  
GGTGATCCGGTAATACGACTCACTATAGGGGTTTCAGAGTTCTACAGTCCGACGATCNNNNACCGTTGA  
GGTGATCCGGTAATACGACTCACTATAGGGGTTTCAGAGTTCTACAGTCCGACGATCNNNNCTGTGAGA  
GGTGATCCGGTAATACGACTCACTATAGGGGTTTCAGAGTTCTACAGTCCGACGATCNNNNTGGAATGA  
GGTGATCCGGTAATACGACTCACTATAGGGGTTTCAGAGTTCTACAGTCCGACGATCNNNNCAAGCAGA  
GGTGATCCGGTAATACGACTCACTATAGGGGTTTCAGAGTTCTACAGTCCGACGATCNNNNGCTGACGA  
GGTGATCCGGTAATACGACTCACTATAGGGGTTTCAGAGTTCTACAGTCCGACGATCNNNNTTAGGCGA  
GGTGATCCGGTAATACGACTCACTATAGGGGTTTCAGAGTTCTACAGTCCGACGATCNNNNAGTCCAGA  
GGTGATCCGGTAATACGACTCACTATAGGGGTTTCAGAGTTCTACAGTCCGACGATCNNNNTCACAAGA  
GGTGATCCGGTAATACGACTCACTATAGGGGTTTCAGAGTTCTACAGTCCGACGATCNNNNCGCATCGA  
GGTGATCCGGTAATACGACTCACTATAGGGGTTTCAGAGTTCTACAGTCCGACGATCNNNNGAGATAGA  
GGTGATCCGGTAATACGACTCACTATAGGGGTTTCAGAGTTCTACAGTCCGACGATCNNNNACGCTAGA  
GGTGATCCGGTAATACGACTCACTATAGGGGTTTCAGAGTTCTACAGTCCGACGATCNNNNGATTCAGA  
GGTGATCCGGTAATACGACTCACTATAGGGGTTTCAGAGTTCTACAGTCCGACGATCNNNNGGCACTGA  
GGTGATCCGGTAATACGACTCACTATAGGGGTTTCAGAGTTCTACAGTCCGACGATCNNNNTACCATGA  
GGTGATCCGGTAATACGACTCACTATAGGGGTTTCAGAGTTCTACAGTCCGACGATCNNNNTGAGTTGA

GGTGATCCGGTAATACGACTCACTATAGGGGTTTCAGAGTTCTACAGTCCGACGATCNNAAGAACGA  
GGTGATCCGGTAATACGACTCACTATAGGGGTTTCAGAGTTCTACAGTCCGACGATCNNTGTTACGA  
GGTGATCCGGTAATACGACTCACTATAGGGGTTTCAGAGTTCTACAGTCCGACGATCNNNATCAGAGA  
GGTGATCCGGTAATACGACTCACTATAGGGGTTTCAGAGTTCTACAGTCCGACGATCNNNACATCCGA  
GGTGATCCGGTAATACGACTCACTATAGGGGTTTCAGAGTTCTACAGTCCGACGATCNNNGTCGTCTGA  
GGTGATCCGGTAATACGACTCACTATAGGGGTTTCAGAGTTCTACAGTCCGACGATCNNNCTTCTTGA  
GGTGATCCGGTAATACGACTCACTATAGGGGTTTCAGAGTTCTACAGTCCGACGATCNNNGTAGGAGA  
GGTGATCCGGTAATACGACTCACTATAGGGGTTTCAGAGTTCTACAGTCCGACGATCNNNCGGTTCTGA  
GGTGATCCGGTAATACGACTCACTATAGGGGTTTCAGAGTTCTACAGTCCGACGATCNNNAGACCTGA  
GGTGATCCGGTAATACGACTCACTATAGGGGTTTCAGAGTTCTACAGTCCGACGATCNNNCCTATAGA  
GGTGATCCGGTAATACGACTCACTATAGGGGTTTCAGAGTTCTACAGTCCGACGATCNNMNTGCCGAGA  
GGTGATCCGGTAATACGACTCACTATAGGGGTTTCAGAGTTCTACAGTCCGACGATCNNNTTGTCTGA  
GGTGATCCGGTAATACGACTCACTATAGGGGTTTCAGAGTTCTACAGTCCGACGATCNNNCTAACCGA

96 bottom oligos 5' to 3'

/5Phos/TCTTGAAGNNNGATCGTCGGACTGTAGA AACTCTGAACCCCTATAGTGAGTCGTATTACCGGGAGCTT  
/5Phos/TCATGGCTNNNGATCGTCGGACTGTAGA AACTCTGAACCCCTATAGTGAGTCGTATTACCGGGAGCTT  
/5Phos/TCTCGTGTNNNGATCGTCGGACTGTAGA AACTCTGAACCCCTATAGTGAGTCGTATTACCGGGAGCTT  
/5Phos/TCGAGGTCNNNGATCGTCGGACTGTAGA AACTCTGAACCCCTATAGTGAGTCGTATTACCGGGAGCTT  
/5Phos/TCTGTCCANNNGATCGTCGGACTGTAGA AACTCTGAACCCCTATAGTGAGTCGTATTACCGGGAGCTT  
/5Phos/TCGGACTTNNNGATCGTCGGACTGTAGA AACTCTGAACCCCTATAGTGAGTCGTATTACCGGGAGCTT  
/5Phos/TCTTCTCNNGATCGTCGGACTGTAGA AACTCTGAACCCCTATAGTGAGTCGTATTACCGGGAGCTT  
/5Phos/TCAAGAGANNNGATCGTCGGACTGTAGA AACTCTGAACCCCTATAGTGAGTCGTATTACCGGGAGCTT  
/5Phos/TCTAACGCNNNGATCGTCGGACTGTAGA AACTCTGAACCCCTATAGTGAGTCGTATTACCGGGAGCTT  
/5Phos/TCAGCACGNNGATCGTCGGACTGTAGA AACTCTGAACCCCTATAGTGAGTCGTATTACCGGGAGCTT  
/5Phos/TCGGCGAANNNGATCGTCGGACTGTAGA AACTCTGAACCCCTATAGTGAGTCGTATTACCGGGAGCTT  
/5Phos/TCAACCATNNNGATCGTCGGACTGTAGA AACTCTGAACCCCTATAGTGAGTCGTATTACCGGGAGCTT  
/5Phos/TCGCATACNNNGATCGTCGGACTGTAGA AACTCTGAACCCCTATAGTGAGTCGTATTACCGGGAGCTT  
/5Phos/TCATTCCGNNGATCGTCGGACTGTAGA AACTCTGAACCCCTATAGTGAGTCGTATTACCGGGAGCTT  
/5Phos/TCTGGATANNNNGATCGTCGGACTGTAGA AACTCTGAACCCCTATAGTGAGTCGTATTACCGGGAGCTT  
/5Phos/TCGTACGANNNNGATCGTCGGACTGTAGA AACTCTGAACCCCTATAGTGAGTCGTATTACCGGGAGCTT  
/5Phos/TCGGCAGTNNNGATCGTCGGACTGTAGA AACTCTGAACCCCTATAGTGAGTCGTATTACCGGGAGCTT  
/5Phos/TCTAGGCGNNNGATCGTCGGACTGTAGA AACTCTGAACCCCTATAGTGAGTCGTATTACCGGGAGCTT  
/5Phos/TCGTTGTGNNGATCGTCGGACTGTAGA AACTCTGAACCCCTATAGTGAGTCGTATTACCGGGAGCTT  
/5Phos/TCTCTAGCNNGATCGTCGGACTGTAGA AACTCTGAACCCCTATAGTGAGTCGTATTACCGGGAGCTT  
/5Phos/TCGAGTAANNNGATCGTCGGACTGTAGA AACTCTGAACCCCTATAGTGAGTCGTATTACCGGGAGCTT  
/5Phos/TCGATCCTNNNGATCGTCGGACTGTAGA AACTCTGAACCCCTATAGTGAGTCGTATTACCGGGAGCTT  
/5Phos/TCAACTGGNNNGATCGTCGGACTGTAGA AACTCTGAACCCCTATAGTGAGTCGTATTACCGGGAGCTT  
/5Phos/TCTCCTCANNNGATCGTCGGACTGTAGA AACTCTGAACCCCTATAGTGAGTCGTATTACCGGGAGCTT  
/5Phos/TCAGTCTCNNGATCGTCGGACTGTAGA AACTCTGAACCCCTATAGTGAGTCGTATTACCGGGAGCTT  
/5Phos/TCGCTGGANNNGATCGTCGGACTGTAGA AACTCTGAACCCCTATAGTGAGTCGTATTACCGGGAGCTT  
/5Phos/TCAGCGTNNNGATCGTCGGACTGTAGA AACTCTGAACCCCTATAGTGAGTCGTATTACCGGGAGCTT  
/5Phos/TCGGAGAGNNNGATCGTCGGACTGTAGA AACTCTGAACCCCTATAGTGAGTCGTATTACCGGGAGCTT  
/5Phos/TCATTGACNNNGATCGTCGGACTGTAGA AACTCTGAACCCCTATAGTGAGTCGTATTACCGGGAGCTT  
/5Phos/TCTTCGTANNNGATCGTCGGACTGTAGA AACTCTGAACCCCTATAGTGAGTCGTATTACCGGGAGCTT  
/5Phos/TCGATATCNNGATCGTCGGACTGTAGA AACTCTGAACCCCTATAGTGAGTCGTATTACCGGGAGCTT  
/5Phos/TCTATCAGNNNGATCGTCGGACTGTAGA AACTCTGAACCCCTATAGTGAGTCGTATTACCGGGAGCTT



/5Phos/TCTAGCGTNNNGATCGTCGGACTGTAGAACTCTGAACCCCTATAGTGAGTCGTATTACCGGGAGCTT  
/5Phos/TCTGAATCNNNGATCGTCGGACTGTAGAACTCTGAACCCCTATAGTGAGTCGTATTACCGGGAGCTT  
/5Phos/TCAGTGCCNNNGATCGTCGGACTGTAGAACTCTGAACCCCTATAGTGAGTCGTATTACCGGGAGCTT  
/5Phos/TCATGGTANNGATCGTCGGACTGTAGAACTCTGAACCCCTATAGTGAGTCGTATTACCGGGAGCTT  
/5Phos/TCAACTCANNGATCGTCGGACTGTAGAACTCTGAACCCCTATAGTGAGTCGTATTACCGGGAGCTT  
/5Phos/TCGTTCTNNNGATCGTCGGACTGTAGAACTCTGAACCCCTATAGTGAGTCGTATTACCGGGAGCTT  
/5Phos/TCGTAACANNGATCGTCGGACTGTAGAACTCTGAACCCCTATAGTGAGTCGTATTACCGGGAGCTT  
/5Phos/TCTCTGATNNNGATCGTCGGACTGTAGAACTCTGAACCCCTATAGTGAGTCGTATTACCGGGAGCTT  
/5Phos/TCGGATGTNNNGATCGTCGGACTGTAGAACTCTGAACCCCTATAGTGAGTCGTATTACCGGGAGCTT  
/5Phos/TCGACGACNNNGATCGTCGGACTGTAGAACTCTGAACCCCTATAGTGAGTCGTATTACCGGGAGCTT  
/5Phos/TCAAGAAGNNNGATCGTCGGACTGTAGAACTCTGAACCCCTATAGTGAGTCGTATTACCGGGAGCTT  
/5Phos/TCTCCTACNNNGATCGTCGGACTGTAGAACTCTGAACCCCTATAGTGAGTCGTATTACCGGGAGCTT  
/5Phos/TCGAACGNNNGATCGTCGGACTGTAGAACTCTGAACCCCTATAGTGAGTCGTATTACCGGGAGCTT  
/5Phos/TCAGGTCTNNNGATCGTCGGACTGTAGAACTCTGAACCCCTATAGTGAGTCGTATTACCGGGAGCTT  
/5Phos/TCTATAGNNNGATCGTCGGACTGTAGAACTCTGAACCCCTATAGTGAGTCGTATTACCGGGAGCTT  
/5Phos/TCTCGGCANNGATCGTCGGACTGTAGAACTCTGAACCCCTATAGTGAGTCGTATTACCGGGAGCTT  
/5Phos/TCAGACAANNGATCGTCGGACTGTAGAACTCTGAACCCCTATAGTGAGTCGTATTACCGGGAGCTT  
/5Phos/TCGGTTAGNNNGATCGTCGGACTGTAGAACTCTGAACCCCTATAGTGAGTCGTATTACCGGGAGCTT  
8 nucleotide barcoded CEL-seq primers

384 oligos

GCCGGTAATACGACTCACTATAGGGAGTTCTACAGTCCGACGATCNNNNNCGTCTAATTTTTTTTTTTTTTTTTTTTTT  
GCCGGTAATACGACTCACTATAGGGAGTTCTACAGTCCGACGATCNNNNNAGACTCGTTTTTTTTTTTTTTTTTTTTT  
GCCGGTAATACGACTCACTATAGGGAGTTCTACAGTCCGACGATCNNNNNNGCACGTCATTTTTTTTTTTTTTTTTTT  
GCCGGTAATACGACTCACTATAGGGAGTTCTACAGTCCGACGATCNNNNNTCAACGACTTTTTTTTTTTTTTTTTTT  
GCCGGTAATACGACTCACTATAGGGAGTTCTACAGTCCGACGATCNNNNNATTTAGCGTTTTTTTTTTTTTTTTTT  
GCCGGTAATACGACTCACTATAGGGAGTTCTACAGTCCGACGATCNNNNNATAACAGACTTTTTTTTTTTTTTTTTTT  
GCCGGTAATACGACTCACTATAGGGAGTTCTACAGTCCGACGATCNNNNNTGCGTAGGTTTTTTTTTTTTTTTTTT  
GCCGGTAATACGACTCACTATAGGGAGTTCTACAGTCCGACGATCNNNNNTGGAGCTCTTTTTTTTTTTTTTTTTTT  
GCCGGTAATACGACTCACTATAGGGAGTTCTACAGTCCGACGATCNNNNNTGAATACCTTTTTTTTTTTTTTTTTTT  
GCCGGTAATACGACTCACTATAGGGAGTTCTACAGTCCGACGATCNNNNNTCTCACACTTTTTTTTTTTTTTTTTTT  
GCCGGTAATACGACTCACTATAGGGAGTTCTACAGTCCGACGATCNNNNNACTGGTATTTTTTTTTTTTTTTTTTT  
GCCGGTAATACGACTCACTATAGGGAGTTCTACAGTCCGACGATCNNNNNACGATAGGTTTTTTTTTTTTTTTTTT  
GCCGGTAATACGACTCACTATAGGGAGTTCTACAGTCCGACGATCNNNNNNGATGTCGATTTTTTTTTTTTTTTTTTT  
GCCGGTAATACGACTCACTATAGGGAGTTCTACAGTCCGACGATCNNNNNTTACGGGTTTTTTTTTTTTTTTTTT  
GCCGGTAATACGACTCACTATAGGGAGTTCTACAGTCCGACGATCNNNNNCACAGCATTTTTTTTTTTTTTTTTTT  
GCCGGTAATACGACTCACTATAGGGAGTTCTACAGTCCGACGATCNNNNNCTTTGACATTTTTTTTTTTTTTTTTTT  
GCCGGTAATACGACTCACTATAGGGAGTTCTACAGTCCGACGATCNNNNNCCTTCAAGTTTTTTTTTTTTTTTTTT  
GCCGGTAATACGACTCACTATAGGGAGTTCTACAGTCCGACGATCNNNNNAGTCTGTTTTTTTTTTTTTTTTTT  
GCCGGTAATACGACTCACTATAGGGAGTTCTACAGTCCGACGATCNNNNNCACACTGATTTTTTTTTTTTTTTTTTT  
GCCGGTAATACGACTCACTATAGGGAGTTCTACAGTCCGACGATCNNNNNNGTTACAGGTTTTTTTTTTTTTTTTTT  
GCCGGTAATACGACTCACTATAGGGAGTTCTACAGTCCGACGATCNNNNNNGACCTTTTTTTTTTTTTTTTTTT  
GCCGGTAATACGACTCACTATAGGGAGTTCTACAGTCCGACGATCNNNNNTTCCGTTCTTTTTTTTTTTTTTTTTTT  
GCCGGTAATACGACTCACTATAGGGAGTTCTACAGTCCGACGATCNNNNNACTGTTTGTTTTTTTTTTTTTTTTTTT  
GCCGGTAATACGACTCACTATAGGGAGTTCTACAGTCCGACGATCNNNNNAAGTGGCTTTTTTTTTTTTTTTTTTT  
GCCGGTAATACGACTCACTATAGGGAGTTCTACAGTCCGACGATCNNNNNCTGTACAATTTTTTTTTTTTTTTTTTT  
GCCGGTAATACGACTCACTATAGGGAGTTCTACAGTCCGACGATCNNNNNCGCAAAGTTTTTTTTTTTTTTTTTT

















GCCGGTAATACGACTCACTATAGGGAGTTCTACAGTCCGACGATCNNNNNNAACCAGTTCTTTTTTTTTTTTTTTTTTTTTT  
GCCGGTAATACGACTCACTATAGGGAGTTCTACAGTCCGACGATCNNNNNNAATAGGGCTTTTTTTTTTTTTTTTTTTTTT  
GCCGGTAATACGACTCACTATAGGGAGTTCTACAGTCCGACGATCNNNNNNAACCCAACTTTTTTTTTTTTTTTTTTTTT  
GCCGGTAATACGACTCACTATAGGGAGTTCTACAGTCCGACGATCNNNNNNGCATAACTTTTTTTTTTTTTTTTTTTTTT  
GCCGGTAATACGACTCACTATAGGGAGTTCTACAGTCCGACGATCNNNNNNGTGCTAGTTTTTTTTTTTTTTTTTTTTT  
GCCGGTAATACGACTCACTATAGGGAGTTCTACAGTCCGACGATCNNNNNNGGTGACTATTTTTTTTTTTTTTTTTTTTTT  
GCCGGTAATACGACTCACTATAGGGAGTTCTACAGTCCGACGATCNNNNNNGGTTAGTGTTTTTTTTTTTTTTTTTTTTT  
GCCGGTAATACGACTCACTATAGGGAGTTCTACAGTCCGACGATCNNNNNNGAAGCAATTTTTTTTTTTTTTTTTTTTTT  
GCCGGTAATACGACTCACTATAGGGAGTTCTACAGTCCGACGATCNNNNNCCGAGATTTTTTTTTTTTTTTTTTTTTT  
GCCGGTAATACGACTCACTATAGGGAGTTCTACAGTCCGACGATCNNNNNCTCTGCTATTTTTTTTTTTTTTTTTTTTTT  
GCCGGTAATACGACTCACTATAGGGAGTTCTACAGTCCGACGATCNNNNNNTAGTTGCGTTTTTTTTTTTTTTTTTTTTT  
GCCGGTAATACGACTCACTATAGGGAGTTCTACAGTCCGACGATCNNNNNAGGCTAACTTTTTTTTTTTTTTTTTTTTTT  
GCCGGTAATACGACTCACTATAGGGAGTTCTACAGTCCGACGATCNNNNNACAAACCGTTTTTTTTTTTTTTTTTTTTT  
GCCGGTAATACGACTCACTATAGGGAGTTCTACAGTCCGACGATCNNNNNATCGACGATTTTTTTTTTTTTTTTTTTTTT  
GCCGGTAATACGACTCACTATAGGGAGTTCTACAGTCCGACGATCNNNNNCTCATGTCTTTTTTTTTTTTTTTTTTTTTT  
GCCGGTAATACGACTCACTATAGGGAGTTCTACAGTCCGACGATCNNNNNCCCTAGTATTTTTTTTTTTTTTTTTTTTTT  
GCCGGTAATACGACTCACTATAGGGAGTTCTACAGTCCGACGATCNNNNNCCCTTGACTTTTTTTTTTTTTTTTTTTTTT  
GCCGGTAATACGACTCACTATAGGGAGTTCTACAGTCCGACGATCNNNNNNTGTGGCTTTTTTTTTTTTTTTTTTTTTT  
GCCGGTAATACGACTCACTATAGGGAGTTCTACAGTCCGACGATCNNNNNNGCGATATCTTTTTTTTTTTTTTTTTTTTTT  
GCCGGTAATACGACTCACTATAGGGAGTTCTACAGTCCGACGATCNNNNNACGAACACTTTTTTTTTTTTTTTTTTTTTT  
GCCGGTAATACGACTCACTATAGGGAGTTCTACAGTCCGACGATCNNNNNNTTGATGGCTTTTTTTTTTTTTTTTTTTTTT  
GCCGGTAATACGACTCACTATAGGGAGTTCTACAGTCCGACGATCNNNNNNAACATGGGTTTTTTTTTTTTTTTTTTTTT  
GCCGGTAATACGACTCACTATAGGGAGTTCTACAGTCCGACGATCNNNNNCTTAGCCTTTTTTTTTTTTTTTTTTTTTT  
GCCGGTAATACGACTCACTATAGGGAGTTCTACAGTCCGACGATCNNNNNAAAGCGGATTTTTTTTTTTTTTTTTTTTTT  
GCCGGTAATACGACTCACTATAGGGAGTTCTACAGTCCGACGATCNNNNNCAATGGTCTTTTTTTTTTTTTTTTTTTTTT  
GCCGGTAATACGACTCACTATAGGGAGTTCTACAGTCCGACGATCNNNNNNAACCGAATTTTTTTTTTTTTTTTTTTTTT  
GCCGGTAATACGACTCACTATAGGGAGTTCTACAGTCCGACGATCNNNNNNAACTCTGGTTTTTTTTTTTTTTTTTTTTT  
GCCGGTAATACGACTCACTATAGGGAGTTCTACAGTCCGACGATCNNNNNNTTAGGCAGTTTTTTTTTTTTTTTTTTTTT  
GCCGGTAATACGACTCACTATAGGGAGTTCTACAGTCCGACGATCNNNNNCGTCTGTTTTTTTTTTTTTTTTTTTTT  
GCCGGTAATACGACTCACTATAGGGAGTTCTACAGTCCGACGATCNNNNNCCCTGCTATTTTTTTTTTTTTTTTTTTTTT  
GCCGGTAATACGACTCACTATAGGGAGTTCTACAGTCCGACGATCNNNNNCAAGAAAGTTTTTTTTTTTTTTTTTTTTT  
GCCGGTAATACGACTCACTATAGGGAGTTCTACAGTCCGACGATCNNNNNNGATTGTCCTTTTTTTTTTTTTTTTTTTTT  
GCCGGTAATACGACTCACTATAGGGAGTTCTACAGTCCGACGATCNNNNNCACTCTATTTTTTTTTTTTTTTTTTTTTT  
GCCGGTAATACGACTCACTATAGGGAGTTCTACAGTCCGACGATCNNNNNAGTTGGACTTTTTTTTTTTTTTTTTTTTTT  
GCCGGTAATACGACTCACTATAGGGAGTTCTACAGTCCGACGATCNNNNNAGTGCAGATTTTTTTTTTTTTTTTTTTTTT  
GCCGGTAATACGACTCACTATAGGGAGTTCTACAGTCCGACGATCNNNNNCTCTGTCTTTTTTTTTTTTTTTTTTTTTT



### Supplementary Table 3

#### 8 nucleotide barcoded CEL-Seq2 primers

384 oligos

GCCGGTAATACGACTCACTATAGGGAGTTCTACAGTCCGACGATCNNNNNNCGTCTAATTTTTTTTTTTTTTTTTTTTTTTT  
GCCGGTAATACGACTCACTATAGGGAGTTCTACAGTCCGACGATCNNNNNNAGACTCGTTTTTTTTTTTTTTTTTTTTTTT  
GCCGGTAATACGACTCACTATAGGGAGTTCTACAGTCCGACGATCNNNNNNGCACGTCATTTTTTTTTTTTTTTTTTTTTTT  
GCCGGTAATACGACTCACTATAGGGAGTTCTACAGTCCGACGATCNNNNNNNTCAACGACTTTTTTTTTTTTTTTTTTTTTTT  
GCCGGTAATACGACTCACTATAGGGAGTTCTACAGTCCGACGATCNNNNNNATTTAGCGTTTTTTTTTTTTTTTTTTTTTTT  
GCCGGTAATACGACTCACTATAGGGAGTTCTACAGTCCGACGATCNNNNNNNATACAGACTTTTTTTTTTTTTTTTTTTTTTT  
GCCGGTAATACGACTCACTATAGGGAGTTCTACAGTCCGACGATCNNNNNNNTGCGTAGGTTTTTTTTTTTTTTTTTTTTTT  
GCCGGTAATACGACTCACTATAGGGAGTTCTACAGTCCGACGATCNNNNNNNTGGAGCTCTTTTTTTTTTTTTTTTTTTTTTT  
GCCGGTAATACGACTCACTATAGGGAGTTCTACAGTCCGACGATCNNNNNNNTGAATACCTTTTTTTTTTTTTTTTTTTTTTT  
GCCGGTAATACGACTCACTATAGGGAGTTCTACAGTCCGACGATCNNNNNNNTCTCACACTTTTTTTTTTTTTTTTTTTTTTT  
GCCGGTAATACGACTCACTATAGGGAGTTCTACAGTCCGACGATCNNNNNNNTACTGGTATTTTTTTTTTTTTTTTTTTTTTT  
GCCGGTAATACGACTCACTATAGGGAGTTCTACAGTCCGACGATCNNNNNNNACGATAGGTTTTTTTTTTTTTTTTTTTTTTT  
GCCGGTAATACGACTCACTATAGGGAGTTCTACAGTCCGACGATCNNNNNNNGATGTGCGATTTTTTTTTTTTTTTTTTTTTTT  
GCCGGTAATACGACTCACTATAGGGAGTTCTACAGTCCGACGATCNNNNNNNTTACGGGTTTTTTTTTTTTTTTTTTTTTTTT  
GCCGGTAATACGACTCACTATAGGGAGTTCTACAGTCCGACGATCNNNNNNNCACAGCATTTTTTTTTTTTTTTTTTTTTTTT  
GCCGGTAATACGACTCACTATAGGGAGTTCTACAGTCCGACGATCNNNNNNNCTTTGACATTTTTTTTTTTTTTTTTTTTTTT  
GCCGGTAATACGACTCACTATAGGGAGTTCTACAGTCCGACGATCNNNNNNNCCTTCAAGTTTTTTTTTTTTTTTTTTTTTT  
GCCGGTAATACGACTCACTATAGGGAGTTCTACAGTCCGACGATCNNNNNNNGAGTCTGTGTTTTTTTTTTTTTTTTTTTTTT  
GCCGGTAATACGACTCACTATAGGGAGTTCTACAGTCCGACGATCNNNNNNNCACACTGATTTTTTTTTTTTTTTTTTTTTTT  
GCCGGTAATACGACTCACTATAGGGAGTTCTACAGTCCGACGATCNNNNNNNGTTACAGGTTTTTTTTTTTTTTTTTTTTTTT  
GCCGGTAATACGACTCACTATAGGGAGTTCTACAGTCCGACGATCNNNNNNNGGACCTTTTTTTTTTTTTTTTTTTTTTTTT  
GCCGGTAATACGACTCACTATAGGGAGTTCTACAGTCCGACGATCNNNNNNNTCCGTTCTTTTTTTTTTTTTTTTTTTTTTT  
GCCGGTAATACGACTCACTATAGGGAGTTCTACAGTCCGACGATCNNNNNNNACTGTTGTGTTTTTTTTTTTTTTTTTTTTTT  
GCCGGTAATACGACTCACTATAGGGAGTTCTACAGTCCGACGATCNNNNNNNAAGTGGCTTTTTTTTTTTTTTTTTTTTTTT  
GCCGGTAATACGACTCACTATAGGGAGTTCTACAGTCCGACGATCNNNNNNNCTGTACAATTTTTTTTTTTTTTTTTTTTTTT  
GCCGGTAATACGACTCACTATAGGGAGTTCTACAGTCCGACGATCNNNNNNNCGAAAGTTTTTTTTTTTTTTTTTTTTTTTT  
GCCGGTAATACGACTCACTATAGGGAGTTCTACAGTCCGACGATCNNNNNNNGTGCATGATTTTTTTTTTTTTTTTTTTTTTT  
GCCGGTAATACGACTCACTATAGGGAGTTCTACAGTCCGACGATCNNNNNNNGTCATTAGTTTTTTTTTTTTTTTTTTTTTT  
GCCGGTAATACGACTCACTATAGGGAGTTCTACAGTCCGACGATCNNNNNNNAGCTCCTTTTTTTTTTTTTTTTTTTTTTTT  
GCCGGTAATACGACTCACTATAGGGAGTTCTACAGTCCGACGATCNNNNNNNTCACCCGATTTTTTTTTTTTTTTTTTTTTTT  
GCCGGTAATACGACTCACTATAGGGAGTTCTACAGTCCGACGATCNNNNNNNGTTGCCACTTTTTTTTTTTTTTTTTTTTTTT  
GCCGGTAATACGACTCACTATAGGGAGTTCTACAGTCCGACGATCNNNNNNNTGTACCAATTTTTTTTTTTTTTTTTTTTTTT  
GCCGGTAATACGACTCACTATAGGGAGTTCTACAGTCCGACGATCNNNNNNNAACGAGGTTTTTTTTTTTTTTTTTTTTTTT  
GCCGGTAATACGACTCACTATAGGGAGTTCTACAGTCCGACGATCNNNNNNNAGCCACCATTTTTTTTTTTTTTTTTTTTTTT  
GCCGGTAATACGACTCACTATAGGGAGTTCTACAGTCCGACGATCNNNNNNNGGTAATCATTTTTTTTTTTTTTTTTTTTTTT  
GCCGGTAATACGACTCACTATAGGGAGTTCTACAGTCCGACGATCNNNNNNCCAGTCCATTTTTTTTTTTTTTTTTTTTTTT  
GCCGGTAATACGACTCACTATAGGGAGTTCTACAGTCCGACGATCNNNNNNNACCTCAGCTTTTTTTTTTTTTTTTTTTTTTT  
GCCGGTAATACGACTCACTATAGGGAGTTCTACAGTCCGACGATCNNNNNNNGTGACTTTTTTTTTTTTTTTTTTTTTTTTT  
GCCGGTAATACGACTCACTATAGGGAGTTCTACAGTCCGACGATCNNNNNNNGACAAACCTTTTTTTTTTTTTTTTTTTTTTT  
GCCGGTAATACGACTCACTATAGGGAGTTCTACAGTCCGACGATCNNNNNNNTAECTCCGTTTTTTTTTTTTTTTTTTTTTT  
GCCGGTAATACGACTCACTATAGGGAGTTCTACAGTCCGACGATCNNNNNNNACACCGTGTTTTTTTTTTTTTTTTTTTTTTT  
GCCGGTAATACGACTCACTATAGGGAGTTCTACAGTCCGACGATCNNNNNNNGTAGAACGTTTTTTTTTTTTTTTTTTTTTT  
GCCGGTAATACGACTCACTATAGGGAGTTCTACAGTCCGACGATCNNNNNNNGGATTGACTTTTTTTTTTTTTTTTTTTTTTT  
GCCGGTAATACGACTCACTATAGGGAGTTCTACAGTCCGACGATCNNNNNNNACGTATCCTTTTTTTTTTTTTTTTTTTTTTT

















GCCGGTAATACGACTCACTATAGGGAGTTCTACAGTCCGACGATCNNNNNNGCGATATCTTTTTTTTTTTTTTTTTTTTTTTT  
GCCGGTAATACGACTCACTATAGGGAGTTCTACAGTCCGACGATCNNNNNNACGAACACTTTTTTTTTTTTTTTTTTTTTTTT  
GCCGGTAATACGACTCACTATAGGGAGTTCTACAGTCCGACGATCNNNNNNTTGATGGCTTTTTTTTTTTTTTTTTTTTTTTT  
GCCGGTAATACGACTCACTATAGGGAGTTCTACAGTCCGACGATCNNNNNNAACATGGGTTTTTTTTTTTTTTTTTTTTTTT  
GCCGGTAATACGACTCACTATAGGGAGTTCTACAGTCCGACGATCNNNNNNCTTAGCCTTTTTTTTTTTTTTTTTTTTTTTT  
GCCGGTAATACGACTCACTATAGGGAGTTCTACAGTCCGACGATCNNNNNNAAGCGGATTTTTTTTTTTTTTTTTTTTTTTT  
GCCGGTAATACGACTCACTATAGGGAGTTCTACAGTCCGACGATCNNNNNNCAATGGTCTTTTTTTTTTTTTTTTTTTTTTTT  
GCCGGTAATACGACTCACTATAGGGAGTTCTACAGTCCGACGATCNNNNNNAACCGGAATTTTTTTTTTTTTTTTTTTTTTTT  
GCCGGTAATACGACTCACTATAGGGAGTTCTACAGTCCGACGATCNNNNNNAACTCTGGTTTTTTTTTTTTTTTTTTTTTTT  
GCCGGTAATACGACTCACTATAGGGAGTTCTACAGTCCGACGATCNNNNNNTTAGGCAGTTTTTTTTTTTTTTTTTTTTTTT  
GCCGGTAATACGACTCACTATAGGGAGTTCTACAGTCCGACGATCNNNNNNCGTCGTTTTTTTTTTTTTTTTTTTTTTTTT  
GCCGGTAATACGACTCACTATAGGGAGTTCTACAGTCCGACGATCNNNNNNCCTGCTATTTTTTTTTTTTTTTTTTTTTTTT  
GCCGGTAATACGACTCACTATAGGGAGTTCTACAGTCCGACGATCNNNNNNCAGAGAAGTTTTTTTTTTTTTTTTTTTTTTT  
GCCGGTAATACGACTCACTATAGGGAGTTCTACAGTCCGACGATCNNNNNNGATTGTCCTTTTTTTTTTTTTTTTTTTTTTTT  
GCCGGTAATACGACTCACTATAGGGAGTTCTACAGTCCGACGATCNNNNNNCACCTCTATTTTTTTTTTTTTTTTTTTTTTTT  
GCCGGTAATACGACTCACTATAGGGAGTTCTACAGTCCGACGATCNNNNNNAGTTGGACTTTTTTTTTTTTTTTTTTTTTTTT  
GCCGGTAATACGACTCACTATAGGGAGTTCTACAGTCCGACGATCNNNNNNAGTGCAGATTTTTTTTTTTTTTTTTTTTTTTT  
GCCGGTAATACGACTCACTATAGGGAGTTCTACAGTCCGACGATCNNNNNNCTCTGTCTTTTTTTTTTTTTTTTTTTTTTTT

**Supplementary Table 4**

|  | <b>Figure</b>          | <b>test</b>          | <b>test statis</b> | <b>p value</b> | <b>n</b> | <b>df</b> |
|--|------------------------|----------------------|--------------------|----------------|----------|-----------|
|  | FigS1b                 | Pearson correlation  | 657,01             | 0              | 24168    | 24166     |
|  | FigS2b (left)          | Pearson correlation  | 201,118            | 0              | 20276    | 20274     |
|  | FigS2c (left)          | Pearson correlation  | 531,72             | 0              | 60028    | 60026     |
|  | FigS2b (right)         | Pearson correlation  | 204,334            | 0              | 17132    | 17130     |
|  | FigS2c (right)         | Pearson correlation  | 721,246            | 0              | 60028    | 60026     |
|  | FigS2h (top; 64nM)     | Pearson correlation  | -2,29452           | 0,02326        | 141      | 139       |
|  | FigS2h (bottom; 128nM) | Pearson correlation  | 1,20471            | 0,23522        | 43       | 41        |
|  | FigS4b (left)          | Pearson correlation  | 146,18             | 0              | 56621    | 56619     |
|  | FigS4b (right)         | Pearson correlation  | 116,207            | 0              | 57238    | 57236     |
|  | Fig3c (Dam-LMNB1)      | One-sample t-test    | -11,5798           | 1,9E-30        | 3497     | 3496      |
|  | Fig3c (Dam)            | One-sample t-test    | 11,2099            | 1,1E-28        | 3668     | 3667      |
|  | FigS6d                 | Pearson correlation  | 8,48884            | 2,89E-17       | 4051     | 4049      |
|  | Fig4c (DE up)          | One-sample t-test    | 5,3248             | 3,4E-07        | 158      | 157       |
|  | Fig4c (DE down)        | One-sample t-test    | -6,52035           | 1,5E-10        | 577      | 576       |
|  | Fig4c (not DE)         | One-sample t-test    | -1,43223           | 0,15213        | 6056     | 6055      |
|  | Fig4f (left, serum)    | Spearman correlation | NA                 | 0,0196254      | 61       | 59        |
|  | Fig4f (right, day3)    | Spearman correlation | NA                 | 4,7E-12        | 146      | 144       |
|  | FigS7c                 | Pearson correlation  | 15,3439            | 1,3E-52        | 11221    | 11219     |
|  | FigS7f                 | Pearson correlation  | NA                 | 0              | 22486    | 22484     |
